# Supplementary material for: A Survey of Zoonotic Bacteria in the Spleen of Six Species of Rodents in Panama
Source: Preprints.org preprint supplement (doi:10.20944/preprints202401.0801.v1), 2024-01-10
Supplement: Supplementary file 1 [file supplementary]

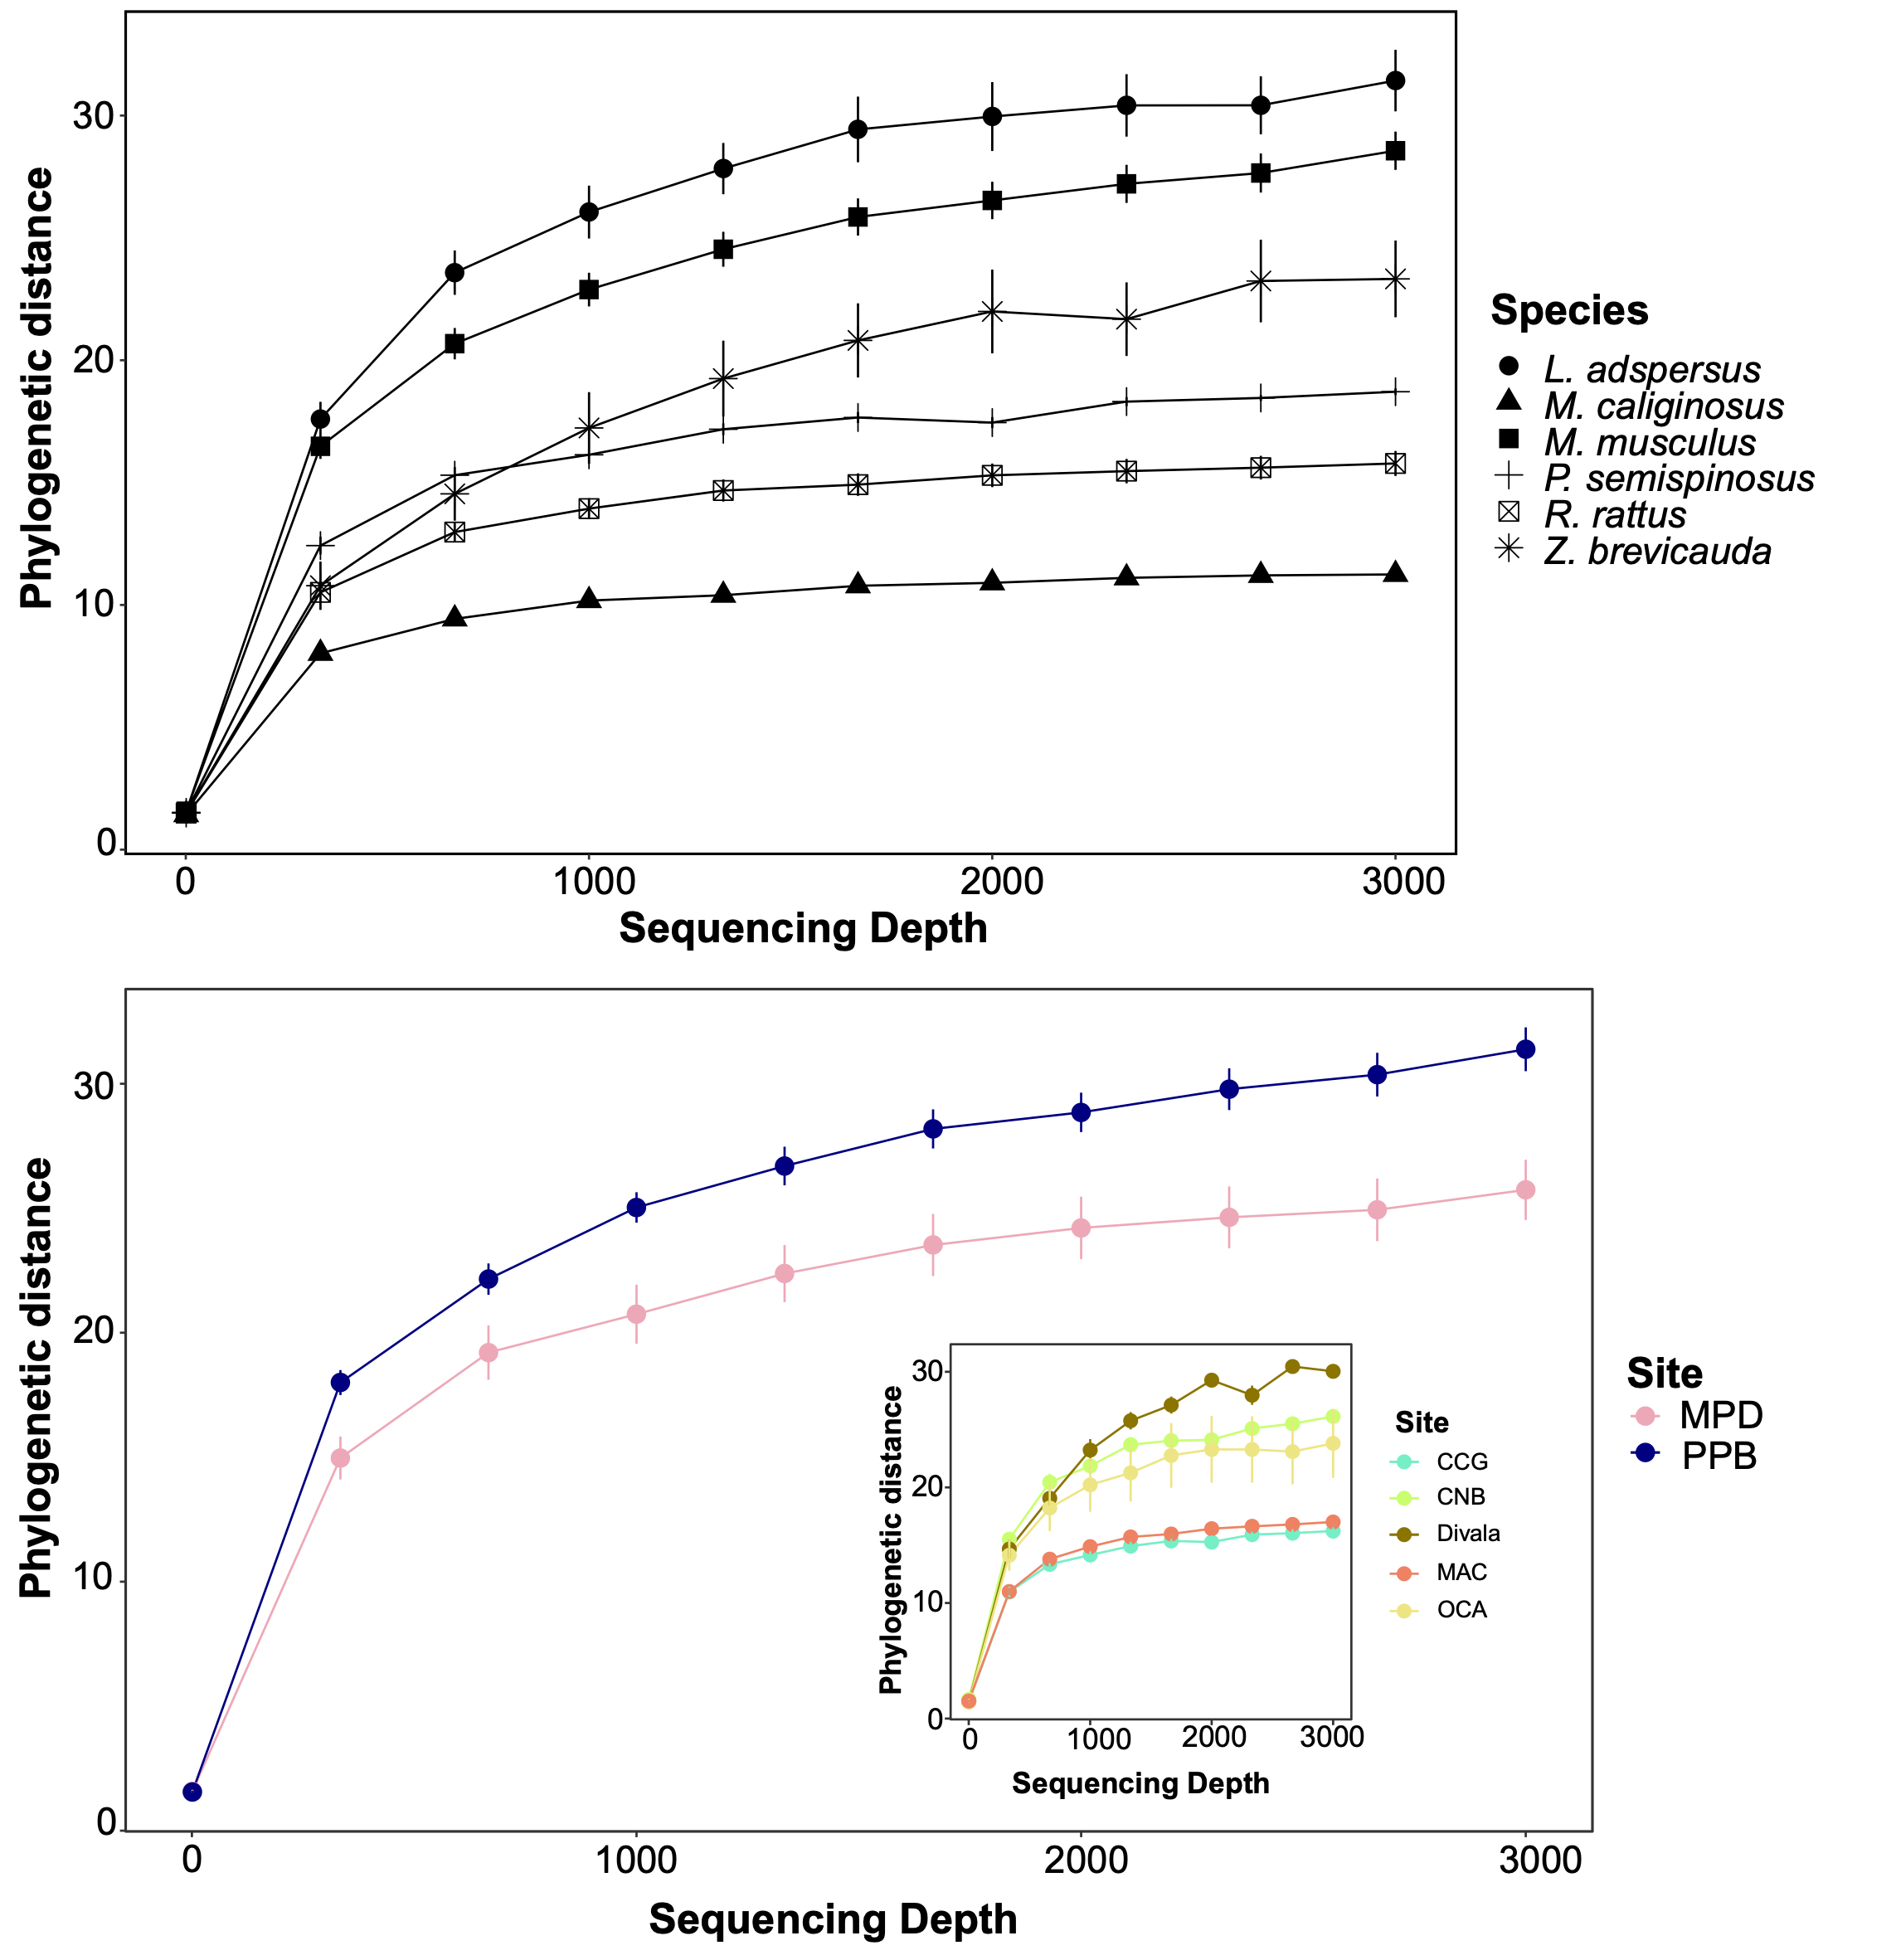


**Figure S1.** Rarefaction curves of bacterial phylogenetic diversity (Faith’s PD, ±SE) associated with species of rodents from Panama (**A**) and associated with *M. musculus* from two sites (**B**). Inner plot showed rarefaction curves from other sites collected.
